# Supplementary material for: Collaborating to Improve Neonatal Care: ParentAl Participation on the NEonatal Ward—Study Protocol of the neoPARTNER Study
Source: MDPI journal article supplement (doi:10.3390/children10091482), 2023-08-30
Supplement: s1 [file s1]

## Supplementary Material—Table S1

**Table S1.** List of additional members of the neoPARTNER study and project group.

| Author's Name            | Affiliation/Participating Centre                                                                                                                                                                  | City                       | Role                                            |
|--------------------------|---------------------------------------------------------------------------------------------------------------------------------------------------------------------------------------------------|----------------------------|-------------------------------------------------|
| Cécile R.L. Boot         | Department of Public and Occupational Health, Amsterdam UMC, VU University<br><br>Amsterdam Public Health research institute, Societal Participation and Health                                   | Amsterdam, The Netherlands | Member of neoPARTNER project group <sup>1</sup> |
| George Damhuis           | Division of Neonatology, Department of Paediatrics, Erasmus MC Sophia Children's Hospital, University Medical Centre Rotterdam                                                                    | Rotterdam, The Netherlands | Member of neoPARTNER project group <sup>1</sup> |
| Nanon H.M. Labrie        | Department of Language, Literature & Communication, Amsterdam UMC, VU University                                                                                                                  | Amsterdam, The Netherlands | Member of neoPARTNER project group <sup>1</sup> |
| Enrico Lopriore          | Division of Neonatology, Department of Paediatrics, Leiden University Medical Centre                                                                                                              | Leiden, The Netherlands    | Member of neoPARTNER project group <sup>1</sup> |
| Sylvia A. Obermann-Borst | Care4Neo, Neonatal Patient and Parent Advocacy Organization                                                                                                                                       | Rotterdam, The Netherlands | Member of neoPARTNER project group <sup>1</sup> |
| Marijn J. Vermeulen      | Care4Neo, Neonatal Patient and Parent Advocacy Organization<br><br>Division of Neonatology, Department of Paediatrics, Erasmus MC Sophia Children's Hospital, University Medical Centre Rotterdam | Rotterdam, The Netherlands | Member of neoPARTNER project group <sup>1</sup> |
| Ron H.T. van Beek        | Amphia Ziekenhuis                                                                                                                                                                                 | Breda, The Netherlands     | Paediatrician-neonatologist, local PI           |

|                                   |                                   |                            |                                                 |
|-----------------------------------|-----------------------------------|----------------------------|-------------------------------------------------|
| Bas Harzing                       | Amphia Ziekenhuis                 | Breda, The Netherlands     | Research assistant                              |
| Hannie A.M.M. van Achterberg      | Amphia Ziekenhuis                 | Breda, The Netherlands     | Research assistant                              |
| Lotte H. Hendriks                 | BovenIJ Ziekenhuis                | Amsterdam, The Netherlands | Paediatrician, local PI                         |
| Ariena J. Rasker <sup>2</sup>     | BovenIJ Ziekenhuis                | Amsterdam, The Netherlands | Research assistant                              |
| Okke Hoonhout <sup>2</sup>        | BovenIJ                           | Amsterdam, The Netherlands | Research assistant                              |
| Claire A.M. Lutterman             | Flevoziekenhuis                   | Almere, The Netherlands    | Paediatrician-neonatologist, local PI           |
| Jessica E. van Veen               | Flevoziekenhuis                   | Almere, The Netherlands    | Research assistant                              |
| Romee M. Willemsen                | Flevoziekenhuis                   | Almere, The Netherlands    | Research assistant                              |
| Angelique K.E. Hoffmann-Haringsma | Franciscus Gasthuis & Vlietland   | Rotterdam, The Netherlands | Paediatrician-neonatologist, local PI           |
| Mariëlle Maissan                  | Franciscus Gasthuis & Vlietland   | Rotterdam, The Netherlands | Physician-assistant                             |
| Anne M. de Grauw                  | Juliana Kinderziekenhuis          | Den Haag, The Netherlands  | Paediatrician-neonatologist, local PI           |
| Leo Wewerinke                     | Juliana Kinderziekenhuis          | Den Haag, The Netherlands  | Paediatrician-neonatologist, local investigator |
| Alma Qureshi                      | Juliana Kinderziekenhuis          | Den Haag, The Netherlands  | Research assistant                              |
| Ageeth G. Kaspers                 | Medisch Spectrum Twente           | Enschede, The Netherlands  | Paediatrician-neonatologist, local PI           |
| Deborah Zagers                    | Medisch Spectrum Twente           | Enschede, The Netherlands  | Research assistant                              |
| Femke de Groof                    | Noordwest Ziekenhuisgroep Alkmaar | Alkmaar, The Netherlands   | Paediatrician-neonatologist, local PI           |
| Priscella Eppenga-Franklin        | Noordwest Ziekenhuisgroep Alkmaar | Alkmaar, The Netherlands   | Research assistant                              |
| Monique J.M. van Brakel           | Tergooi MC                        | Hilversum, The Netherlands | Paediatrician, local PI                         |
| Celine Seegers                    | Tergooi MC                        | Hilversum, The Netherlands | Research assistant                              |
| Maarten Rijpert                   | Zaans Medisch Centrum             | Zaandam, The Netherlands   | Paediatrician-neonatologist, local PI           |
| Esther Scheijbeler <sup>2</sup>   | Zaans Medisch Centrum             | Zaandam, The Netherlands   | Research assistant                              |

|                             |                       |                             |                         |
|-----------------------------|-----------------------|-----------------------------|-------------------------|
| Fenna Visser                | Ziekenhuis Amstelland | Amstelveen, The Netherlands | Paediatrician, local PI |
| Koen Ruiter <sup>2</sup>    | Ziekenhuis Amstelland | Amstelveen, The Netherlands | Research assistant      |
| Esther J. Kret <sup>2</sup> | Ziekenhuis Amstelland | Amstelveen, The Netherlands | Research assistant      |

PI = principal investigator

<sup>1</sup> Members of the neoPARTNER project group greatly contributed to the design of the study and the preparation of the original study protocol.

<sup>2</sup> Primarily employed at OLVG, detached to participating centre during course of the study.
